# Supplementary material for: The evolution of aerosols mixing state derived from a field campaign in Beijing: implications to the particles aging time scale in urban atmosphere
Source: Copernicus journal article supplement (doi:10.5194/egusphere-2024-2999), 2024-10-24
Supplement: Supplementary file 1 [file egusphere-2024-2999-supplement.pdf]

1 *Supplement of*

2 **The evolution of aerosols mixing state derived from a field campaign in Beijing:**  
3 **implications to the particles aging time scale in urban atmosphere**

4 **Jieyao Liu<sup>1</sup>, Fang Zhang<sup>2</sup>, Jingye Ren<sup>3</sup>, Lu Chen<sup>4</sup>**

5  
6 <sup>1</sup> School of Geographical Sciences, Hebei Normal University, Shijiazhuang, China

7 <sup>2</sup> School of Civil and Environmental Engineering, Harbin Institute of Technology (Shenzhen), Shenzhen, China

8 <sup>3</sup> Xi'an Institute for Innovative Earth Environment Research, Xi'an, China

9 <sup>4</sup> Faculty of Geographical Science, Beijing Normal University, Beijing, China

10  
11 Correspondence to: Fang Zhang ([zhangfang2021@hit.edu.cn](mailto:zhangfang2021@hit.edu.cn))

12  
13 **Content:**

14 Number of figures: 4

15 Number of tables: 1

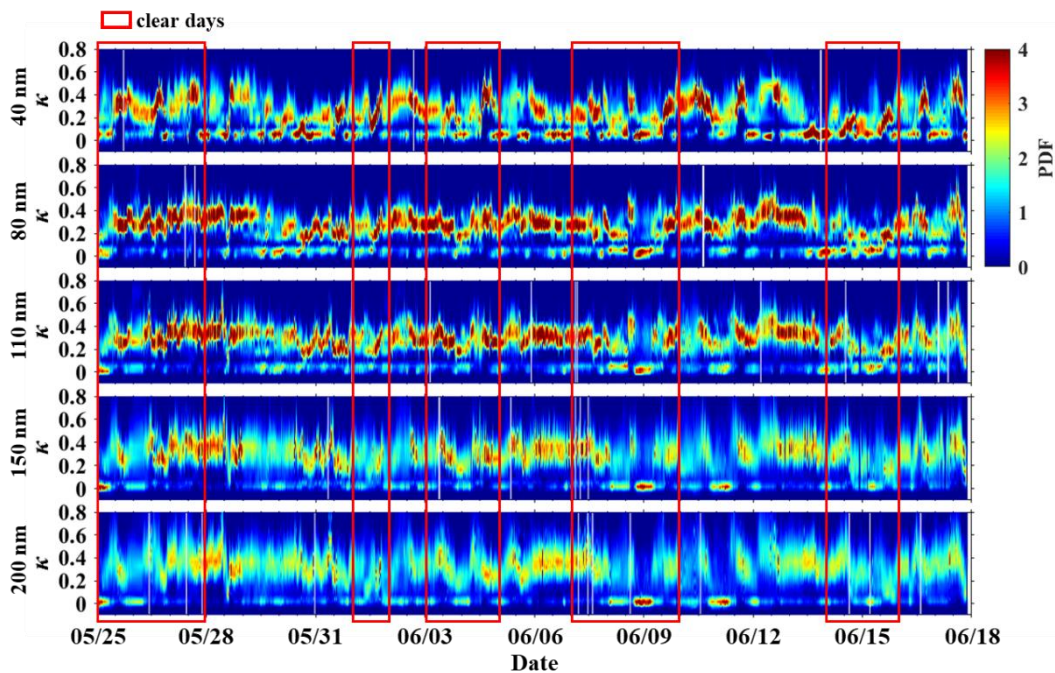

16  
17 Figure S1. Time series of the probability density function of hygroscopic parameter ( $\kappa$ -PDF). Red rectangles  
18 denote clear days, and others are cloudy days.

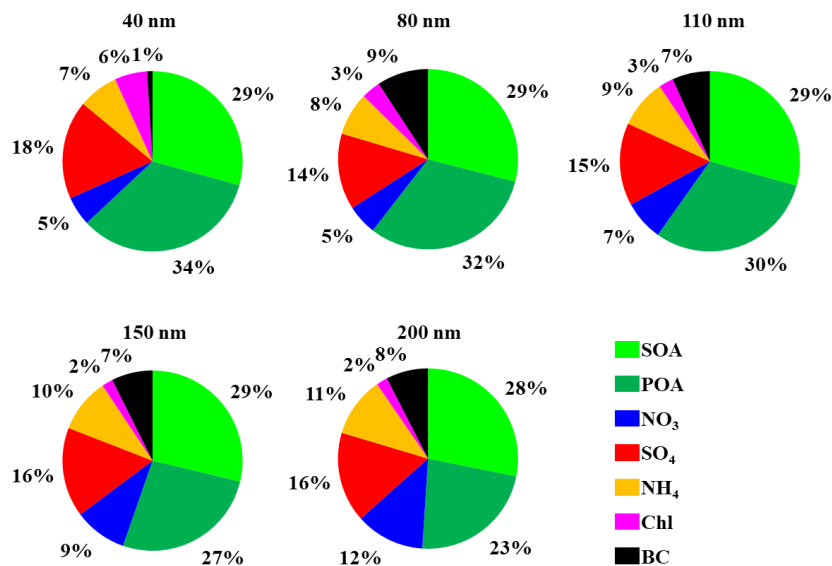

Figure S2. The size-resolved chemical mass fraction at five particle sizes.

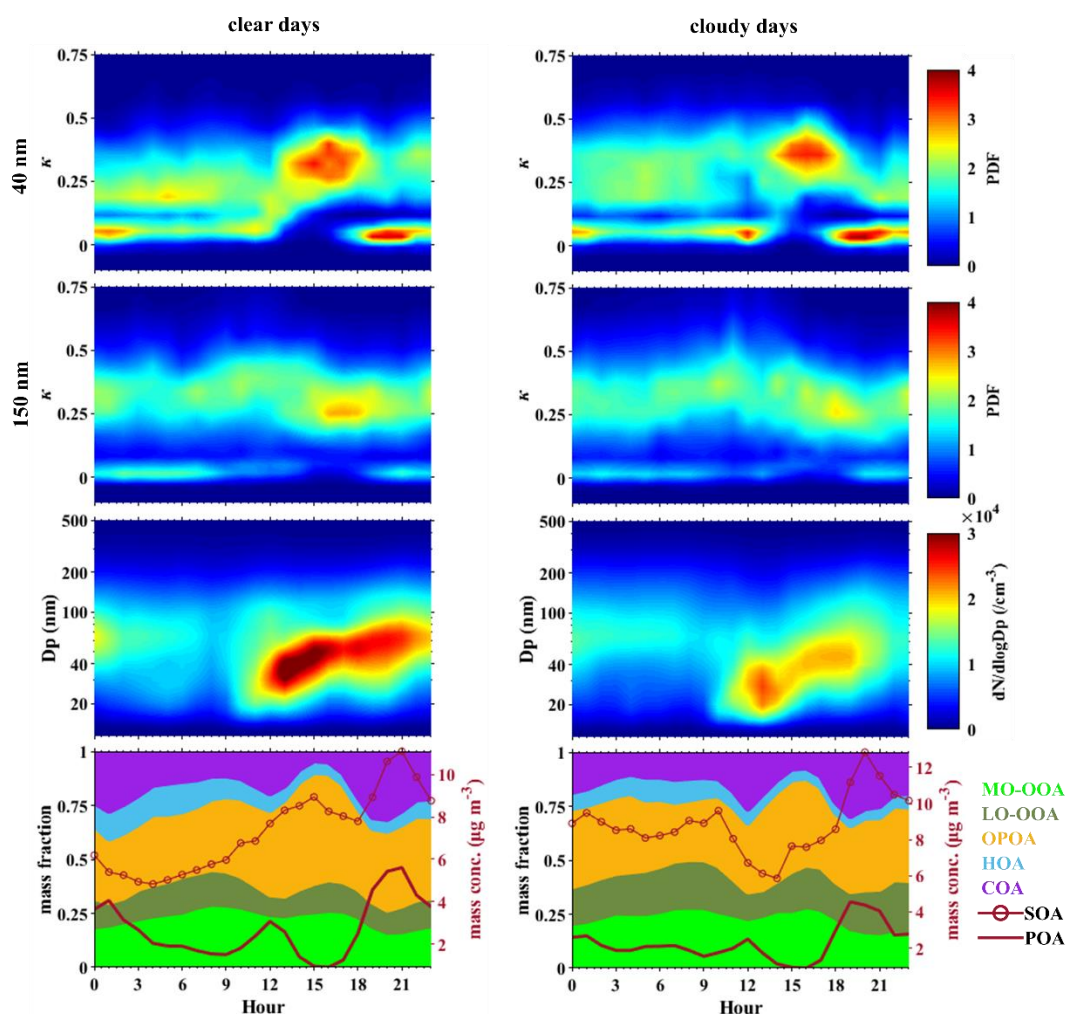

Figure S3. Averaged diurnal variations in  $\kappa$ -PDF for 40 and 150 nm particles, particle number size

distribution, mass fraction of five organic aerosols and mass concentration of primary and secondary organic aerosols on clear and cloudy days.

25

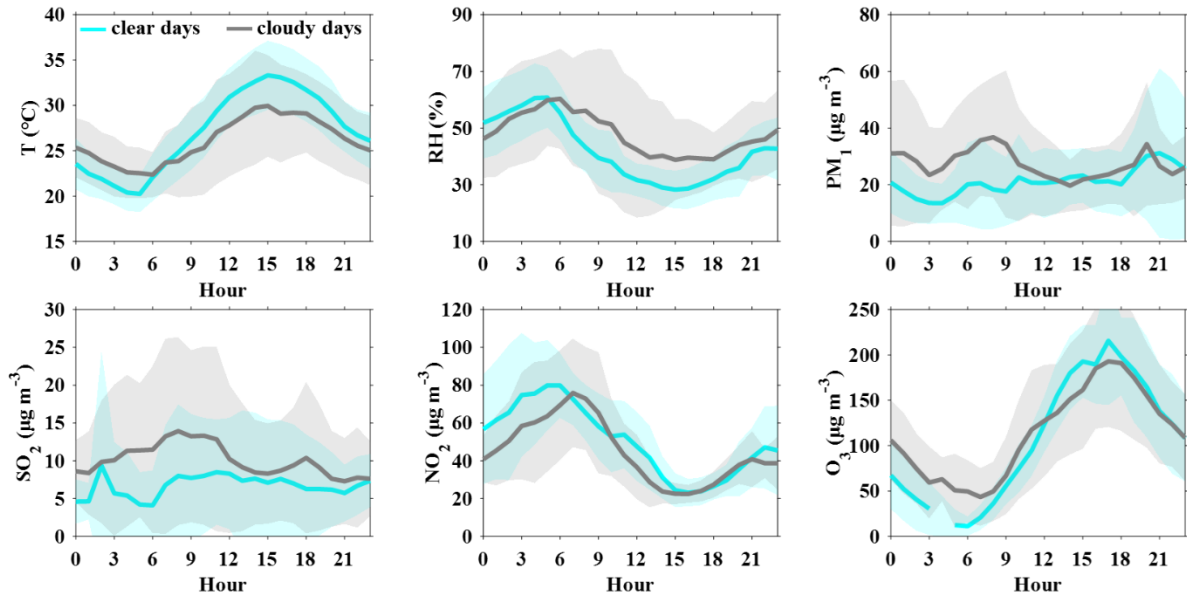

26

27 Figure S4. Diurnal variations of ambient temperature (T), relative humidity (RH) and PM<sub>1</sub> mass  
28 concentrations on clear and cloudy days.

29

30

31

32

33

34

35

36

37

38

40 Table S1. The aging timescale of particles reported in literatures.

| <b>Region</b>             | <b>Model</b>                      | <b>Aerosol type</b>      | <b>Aging timescale</b>               | <b>Rreference</b>        |
|---------------------------|-----------------------------------|--------------------------|--------------------------------------|--------------------------|
|                           | GCM                               | carbonaceous<br>Aerosol  | 1.15 days                            | Cooke et al., 2002       |
|                           | GISS-GCM                          | carbonaceous<br>Aerosol  | 1.15 days                            | Chung and Seinfeld, 2002 |
|                           | GISS-GCM                          | BC                       | 1 day                                | Koch and Hansen, 2005    |
| global<br>(model default) | TOMAS                             | carbonaceous<br>aerosol  | 1.5 days                             | Pierce et al., 2007      |
|                           | GEOS-Chem                         | carbonaceous<br>aerosols | 1.2 days                             | Yu and Luo, 2009         |
|                           | GEOS-4                            | carbonaceous<br>aerosols | 2.5 days                             | Colarco et al., 2010     |
|                           | GFDL-AM3                          | BC                       | 20 days                              | Liu et al., 2011         |
|                           | RegCM4                            | carbonaceous<br>Aerosol  | 1.15 days                            | Ghosh et al., 2021       |
| south-western<br>Germany  | KAMM/DRAIS                        | soot                     | daytime: 2-8 h<br>nighttime: 10-40 h | Riemer et al., 2004      |
| global                    | GEOS-Chem                         | carbonaceous<br>aerosols | 3.1 days                             | Huang et al., 2013       |
| central-eastern<br>China  |                                   |                          | 12 h-7 days                          |                          |
|                           | NAQPMS+APM                        | BC                       |                                      | Chen et al., 2017        |
| Beijing                   |                                   |                          | 2 h                                  |                          |
| south Asia                | RegCM4                            | carbonaceous<br>aerosol  | 7.6-167.6 h                          | Ghosh et al., 2021       |
| Mexico City               | ATOFMS                            | soot                     | 3 h                                  | Moffet and Prather, 2009 |
| California                | SP2                               | BC                       | ~4 h                                 | Akagi et al., 2012       |
| Los Angeles               | SP2                               | BC                       | ~3 h                                 | Krasowsky et al., 2016   |
| Beijing                   |                                   |                          | 2.3 h & 4.6 h                        |                          |
|                           | environmental<br>chamber approach | BC                       |                                      | Peng et al., 2016        |
| Houston                   |                                   |                          | 9 h & 18 h                           |                          |

42  
43 **Reference:**

- 44 Akagi, S, Craven J, Taylor J, et al. Evolution of trace gases and particles emitted by a chaparral fire in California. *Atmospheric*  
45 *Chemistry and Physics*, 2012, 12(3), 1397-1421.
- 46 Cooke W, Ramaswamy V, Kasibhatla P. A general circulation model study of the global carbonaceous aerosol distribution.  
47 *Journal of Geophysical Research: Atmospheres*, 2002, 107(D16).
- 48 Colarco P, Silva A, Chin M, et al. Online simulations of global aerosol distributions in the NASA GEOS-4 model and  
49 comparisons to satellite and ground-based aerosol optical depth. *Journal of Geophysical Research*, 2010, 115, D14207.
- 50 Chen X, Wang Z, Yu F, et al. Estimation of atmospheric aging time of black carbon particles in the polluted atmosphere over  
51 central-eastern China using microphysical process analysis in regional chemical transport model. *Atmospheric*  
52 *Environment*, 2017, 163, 44-56.
- 53 Chung S, Seinfeld J. Global distribution and climate forcing of carbonaceous aerosols. *Journal of Geophysical Research*, 2002,  
54 107(D19), 4407.
- 55 Ghosh S, Riemer N, Giuliani G, et al. Sensitivity of carbonaceous aerosol properties to the implementation of a dynamic aging  
56 parameterization in the regional climate model RegCM. *Journal of Geophysical Research: Atmospheres*, 2021, 126,  
57 e2020JD033613.
- 58 Huang Y, Wu S, Dubey M, et al. Impact of aging mechanism on model simulated carbonaceous aerosols. *Atmospheric*  
59 *Chemistry and Physics*, 2013, 13, 6329-6343.
- 60 Koch D, Hansen J. Distant origins of Arctic black carbon: A Goddard Institute for Space Studies ModelE experiment. *Journal*  
61 *of Geophysical Research*, 2005, 110, D04204.
- 62 Krasowsky T, McMeeking G, Wang D, et al. Measurements of the impact of atmospheric aging on physical and optical  
63 properties of ambient black carbon particles in Los Angeles. *Atmospheric Environment*, 2016, 142, 496-504.
- 64 Liu J, Fan S, Horowitz L, et al. Evaluation of factors controlling long-range transport of black carbon to the Arctic. *Journal*  
65 *of Geophysical Research*, 2011, 116, D04307.
- 66 Moffet R, and Prather K. In-situ measurements of the mixing state and optical properties of soot with implications for radiative  
67 forcing estimates. *Proceedings of the National Academy of Sciences*, 2009, 106(29), 11872-11877.
- 68 Peng J, Hu M, Guo S, et al. Markedly enhanced absorption and direct radiative forcing of black carbon under polluted urban  
69 environments. *Proceedings of the National Academy of Sciences*, 2016, 113(16), 4266-4271.
- 70 Pierce J, Chen K, Adams P. Contribution of carbonaceous aerosol to cloud condensation nuclei: processes and uncertainties  
71 evaluated with a global aerosol microphysics model. *Atmospheric Chemistry and Physics*, 2007, 7, 7723-7765.
- 72 Riemer N, Vogel H, Vogel B. Soot aging time scales in polluted regions during day and night. *Atmospheric Chemistry and*  
73 *Physics*, 2004, 4, 1885-1893.
- 74 Yu F, Luo G. Simulation of particle size distribution with a global aerosol model: contribution of nucleation to aerosol and  
75 CCN number concentrations. *Atmospheric Chemistry and Physics*, 2007, 9, 10597-10645.
